# Supplementary material
Source: HighWire-hosted journal article supplement (https://jnm.snmjournals.org/highwire/filestream/94929/field_highwire_adjunct_files/0/166751_Supplemental_Data.pdf)
Supplement: 166751_Supplemental_Data.pdf [file 166751_Supplemental_Data.pdf]

### **Synthesis of poly(ethylene glycol) $\alpha$ -bromide methacrylate ( $\alpha$ -Br-PEGMA)**

5 kDa Poly(ethylene glycol) mono-boc-protected amino-ether (Intezyne) (425 mg) was deprotected in a 10% trifluoroacetic acid:dichloromethane solution overnight. After drying under vacuum 389 mg of the deprotected polymer was dissolved in 3 mL of dichloromethane. 40.0 mg of 2,5-dioxopyrrolidin-1-yl 2-bromoacetate was added to the solution followed by the addition of 1 mL of triethylamine. After stirring the reaction mixture overnight at room temperature, the solution was precipitated twice in diethyl ether to produce a white powder (yield 210 mg, 54%).

The white powder (165 mg) was dissolved in 5 mL DCM and 1 mL triethylamine and then cooled to 0 °C. Methacryloyl chloride (0.50 mL) was added to the reaction dropwise and then the mixture was warmed to room temperature and stirred overnight. The reaction was washed three times with a 10% NaHSO<sub>4</sub> solution, dried with MgSO<sub>4</sub>, concentrated on a rotary evaporator and precipitated into diethyl ether to achieve a white powder (yield 103 mg, 62%).

### **Synthesis of DOTA- $\alpha$ -bromide-Comb**

The synthesis of comb polymers was adapted from a previous report (26) with the exception of poly(ethylene glycol)  $\alpha$ -bromide methacrylate being incorporated into the polymerization mixture. To illustrate, PEGMA 5.0 kDa (192.3 mg, 0.039 mmol),  $\alpha$ -Br-PEGMA (10 mg, 0.0019 mmol), methyl methacrylate (MMA) (50.0 mg, 0.57 mmol), azobisisobutyronitrile (AIBN) (0.0284 mg, 0.00018 mmol), DOTA-MA (17.6 mg, 0.025 mmol), and RAFT agent (0.26 mg, 0.00089 mmol) were dissolved in DMF (0.52 g). AIBN, DOTA-MA, and RAFT agent were added as DMF stock solutions. The solution was transferred to a 5 mL Schlenk flask and three freeze–pump–thaw cycles performed before being heated at 70 °C for 120 h. Following the polymerization, the solution was diluted with DMF, transferred to four 15 mL centricon tubes (YM-50), and extensively washed with DMF until the removal of all monomers was confirmed by GPC. The copolymer was then washed with Milli-Q water (5x) and freeze–dried to give the desired graft copolymer as a white powder.

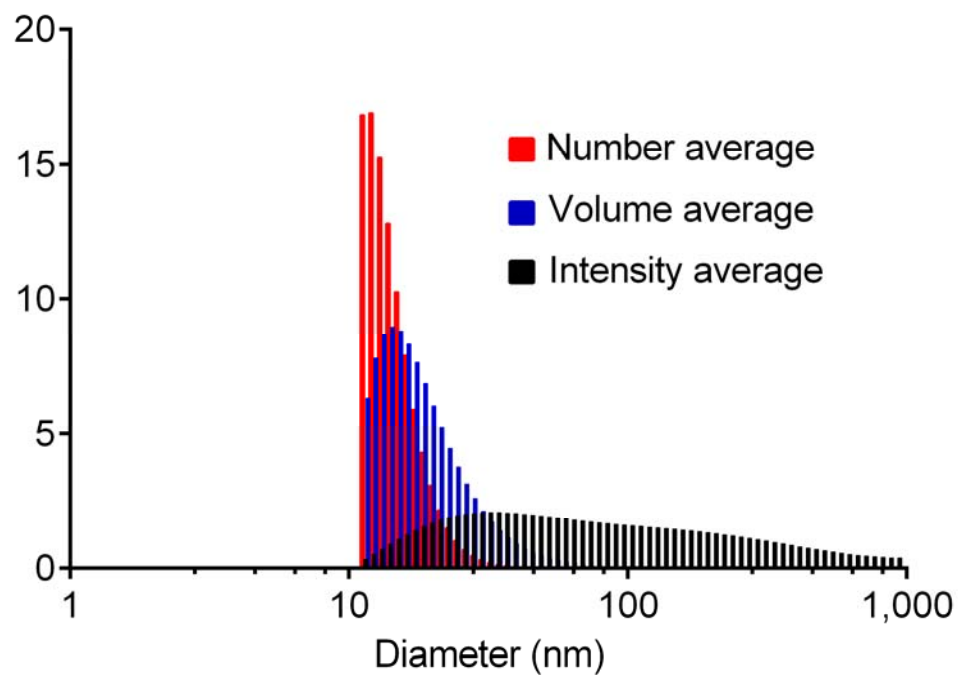

**SUPPLEMENTAL FIGURE 1.** Dynamic light scattering histogram of vMIP-II-Comb.

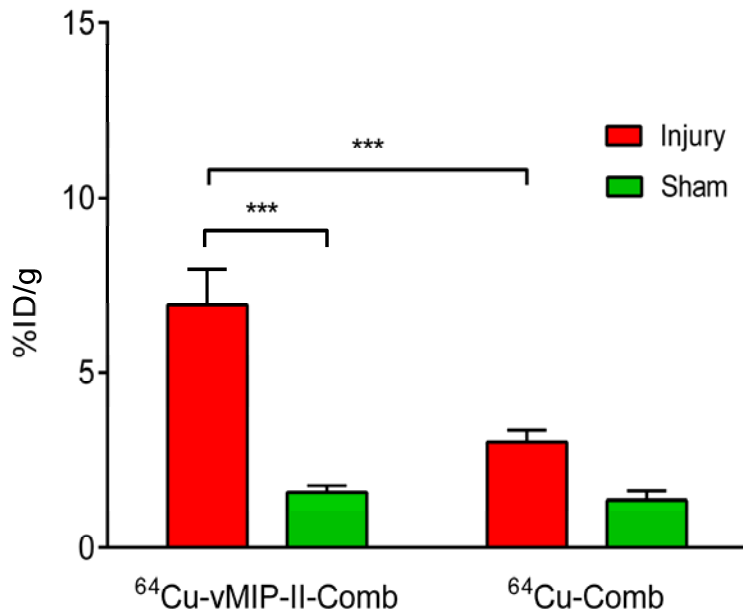

**SUPPLEMENTAL FIGURE 2.** Uptake analysis of  $^{64}\text{Cu-vMIP-II-Comb}$  and  $^{64}\text{Cu-Comb}$  in  $\text{ApoE}^{-/-}$  mice at 4 weeks post injury.

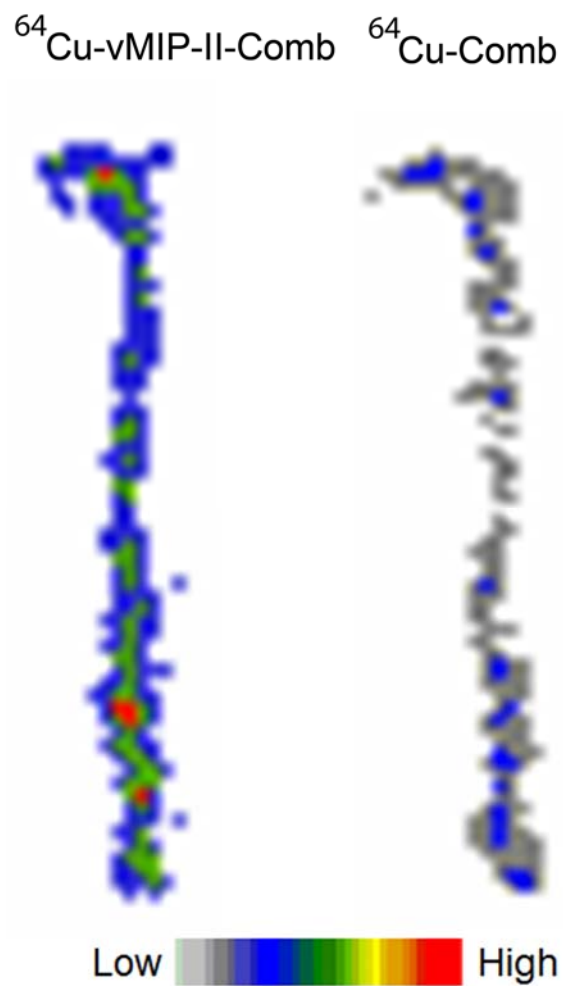

**SUPPLEMENTAL FIGURE 3.** Autoradiography of  $^{64}\text{Cu}$ -vMIP-II-Comb and  $^{64}\text{Cu}$ -Comb at 48 h post injection.

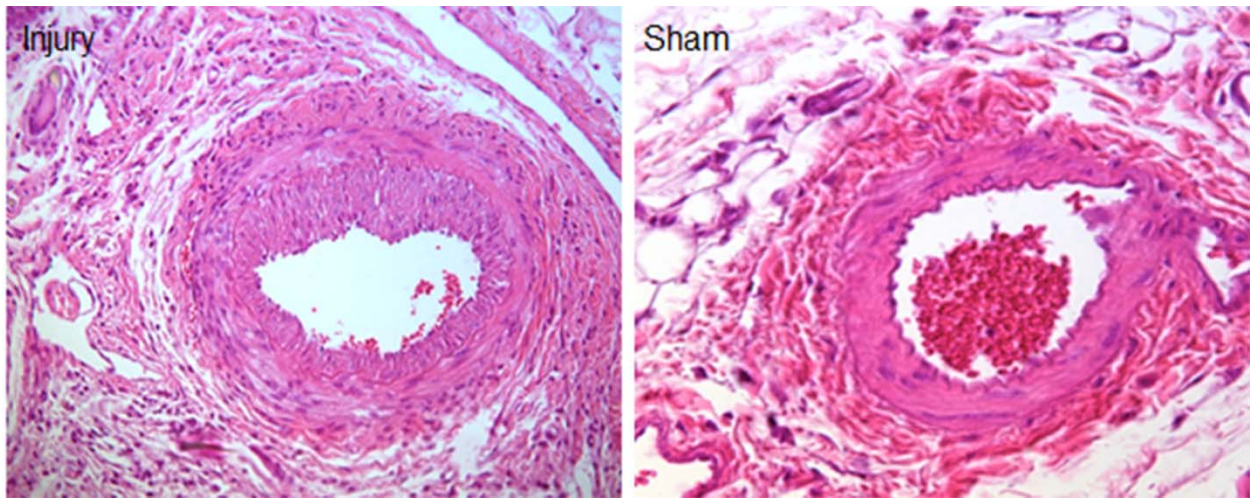

**SUPPLEMENTAL FIGURE 4.** H&E staining of injured and sham-operated femoral arteries of ApoE<sup>-/-</sup> mouse at 2 weeks post injury.

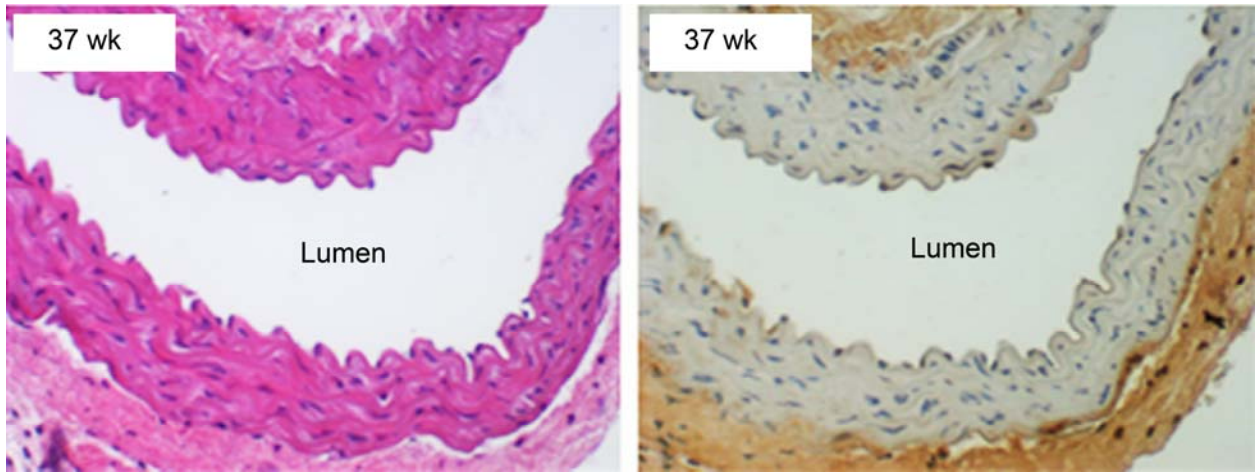

**SUPPLEMENTAL FIGURE 5.** H&E staining and F4/80 immunohistochemistry of aorta from WT mouse at 37 weeks post normal diet.
